# Supplementary material for: Associations Between Dietary Protein Sources, Plasma BCAA and Short-Chain Acylcarnitine Levels in Adults
Source: PubMed Central journal article supplement (PMC6356602; doi:10.3390/nu11010173), 2019-01-15
Supplement: nutrients-11-00173-s001.pdf [file nutrients-11-00173-s001.pdf]

**Supplementary TableS 1: Food grouping used in the dietary pattern analysis**

| Foods or food groups    | Food items in the group                                                                                                                                                                                   |
|-------------------------|-----------------------------------------------------------------------------------------------------------------------------------------------------------------------------------------------------------|
| Red meat                | Beef, veal, lamb, pork, game and horse; burger                                                                                                                                                            |
| Processed meat          | Bacon, sausage, hot dogs, hot dogs on a stick, salami, bologna, ham, pepperoni, cretons, liver paste, terrine, head cheese                                                                                |
| Organ meat              | Liver or other organ meat such as heart, kidney and tongue                                                                                                                                                |
| Fish and other seafood  | Fish and sea food (all kinds); sushi                                                                                                                                                                      |
| Poultry                 | Chicken and turkey with or without skin; chicken nuggets; hot chicken; club sandwich; chicken burger                                                                                                      |
| Eggs                    | Eggs including scrambled, fried, omelets, hard-boiled eggs and quiche                                                                                                                                     |
| Low-fat dairy products  | Skim, 1% or 2%-fat milk (white or chocolate) and yogurt; frozen yogurt                                                                                                                                    |
| High-fat dairy products | Whole milk (white or chocolate); cheese (all kinds); cream; ice cream; yogurt (>2%-fat); parmesan fondue; alfredo and white sauces                                                                        |
| Legumes                 | Legumes including lentils, chickpeas, beans, peas soup; soy product including tofu, soy milk                                                                                                              |
| Nuts                    | All nuts or seed and nuts butter                                                                                                                                                                          |
| Refined grain products  | White breads, bagels, pita, tortillas, English muffins, rice, pasta; muffins (home-made); couscous; pancakes; waffles; granola bar; refined cereal <sup>2</sup>                                           |
| Whole grain products    | Whole-wheat, whole-grain and other multigrain breads, bagels, tortillas, English muffins and pita; wheat or whole-grain pasta and brown rice; oatmeal and cream of wheat; whole-grain cereal <sup>1</sup> |

<sup>1</sup> Cereal that contain  $\leq 2.0$ g fiber/serving are in the refined grains group

<sup>2</sup> Cereal that contain  $> 2.0$ g fiber/serving are in the whole grains group
